# Supplementary material for: Characterizing both bacteria and fungi improves understanding of the Arabidopsis root microbiome
Source: PubMed Central journal article supplement (PMC6328596; doi:10.1038/s41598-018-37208-z), 2019-01-10
Supplement: 41598_2018_37208_MOESM1_ESM.pdf [file 41598_2018_37208_MOESM1_ESM.pdf]

## **Characterizing both bacteria and fungi improves understanding of the *Arabidopsis* root microbiome**

*Supplementary Material.*

Joy Bergelson, Jana Mittelstrass, Matthew W. Horton

### **This file includes:**

#### Supplementary Figures 1-6:

Fig. S1, Read counts per sample.

Fig. S2,  $\beta$ -diversity in the microbiome

Fig. S3, Key taxa in the microbiome

Fig. S4, Correlations among the PCs from PCA of the microbiome

Fig. S5, The results from PCA of the leaf microbiome

Fig. S6, GWAS of PC1 from PCA of the combined microbiome

#### Supplementary Tables S1 and S2:

Table S1, The list of accessions used and their collection locations

Table S2, The biological processes that underlie variation in richness in the root microbiome

## Supplementary Figures

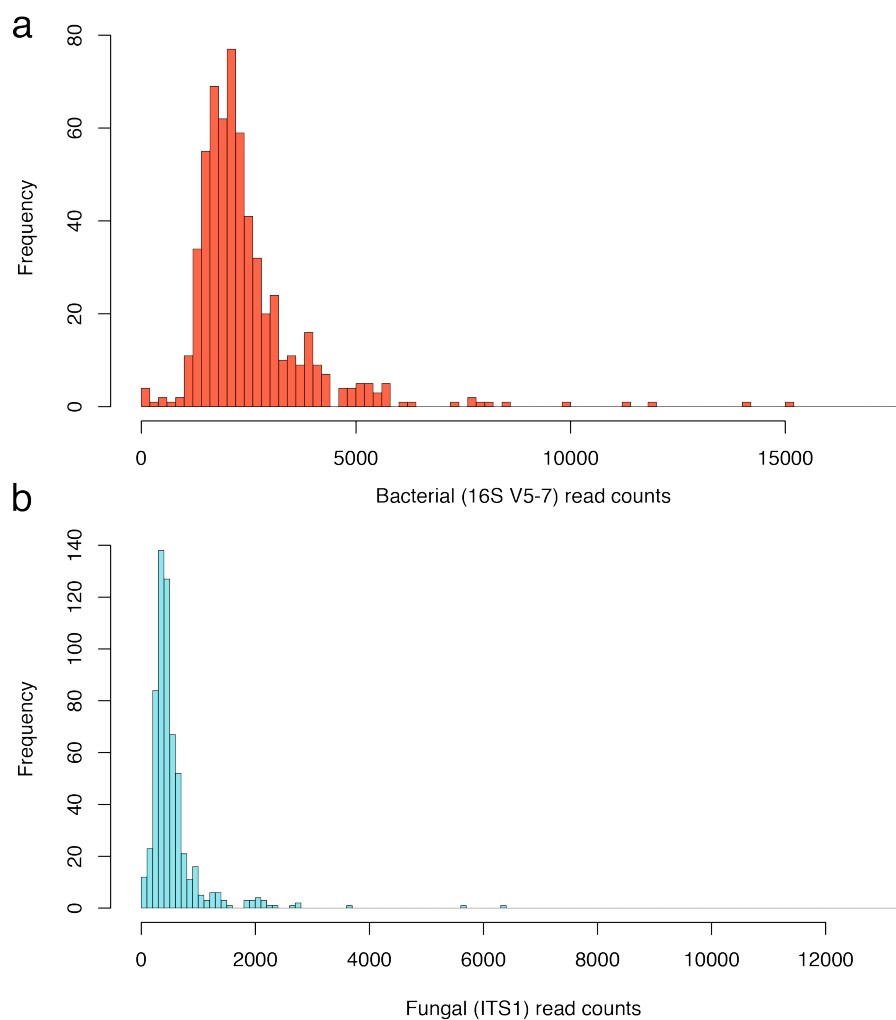

### Supplementary Fig. S1. Read counts per sample

The number of reads per sample for root bacterial (a) and fungal (b) amplicon libraries.

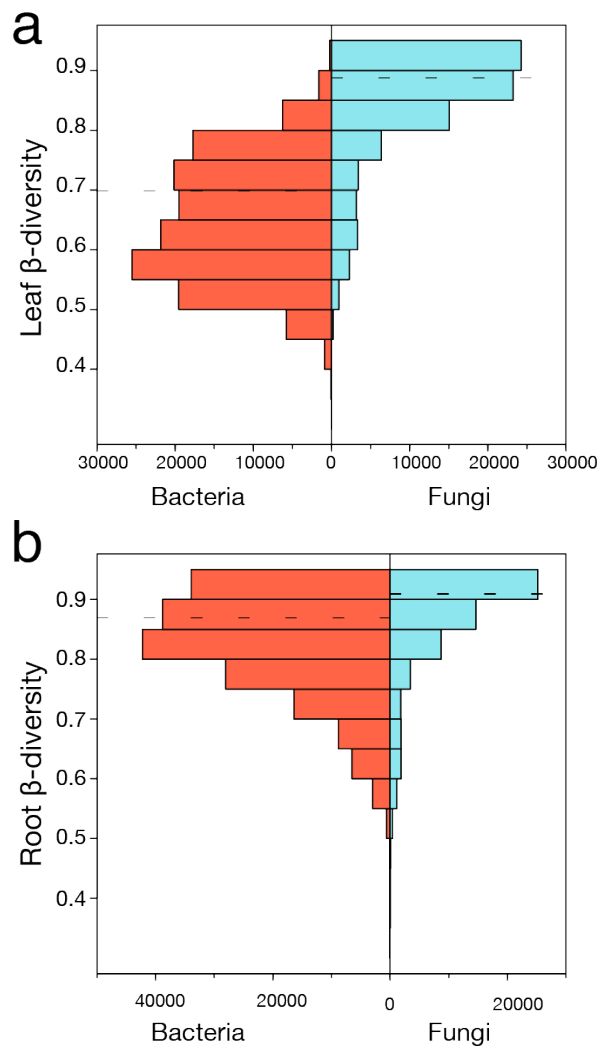

**Supplementary Fig. S2.  $\beta$ -diversity in the microbiome**

$\beta$ -diversity in both the (a) leaf and (b) root microbiome of *A. thaliana*. On average,  $\beta$ -diversity is higher in the root than leaf microbiome for both kingdoms.

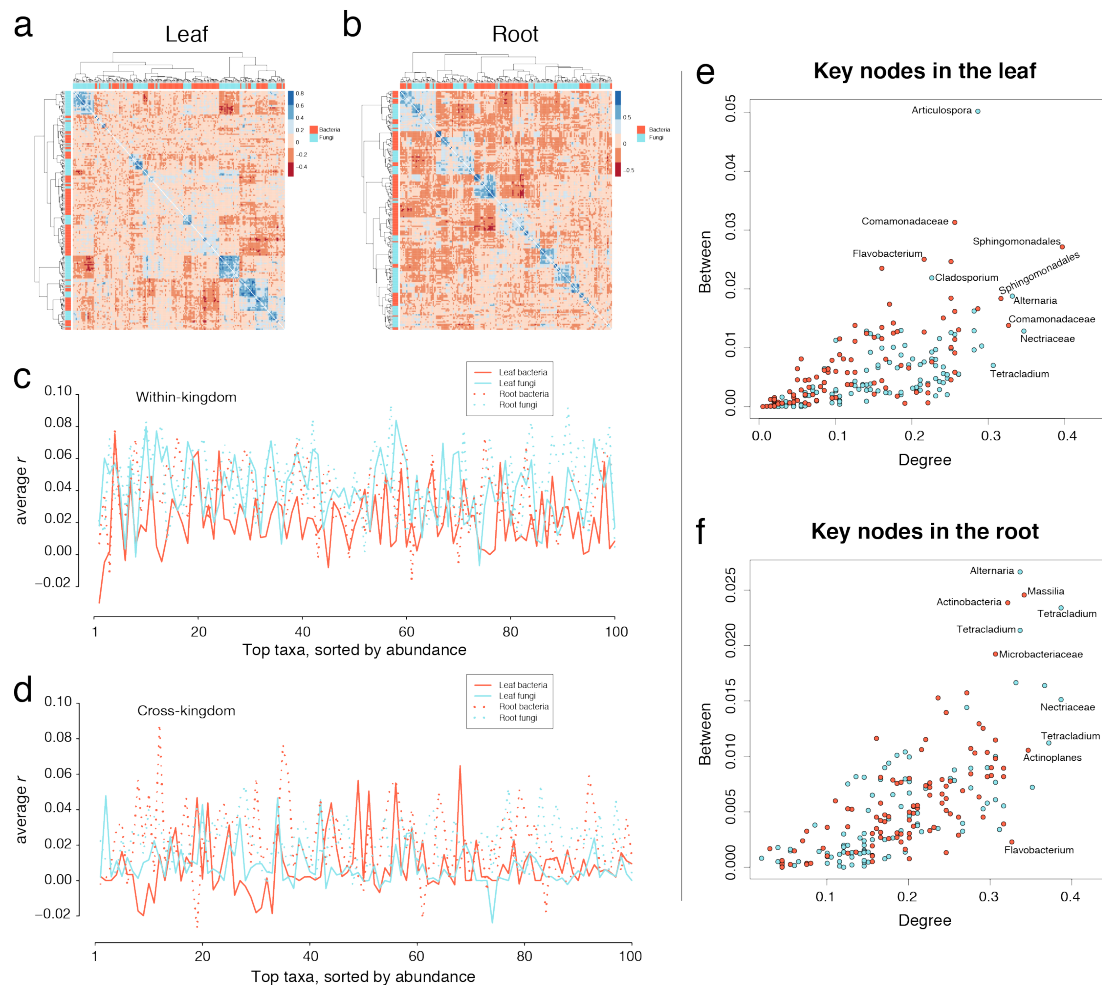

### Supplementary Fig. S3. Key taxa in the microbiome

Correlations within the (a) leaf and (b) root microbiome of *Arabidopsis thaliana*. For ease of presentation and visualization, we show the top 100 taxa in each microbiome. As can be seen by the diagonal elements, the strongest correlations tend to occur among members of the same kingdom. Nevertheless, significant cross-kingdom correlations suggest that taxa within the leaf and root microbiome may interact or be shaped by similar environmental and/or host-related processes. (c) The average intra- and (d) inter-kingdom correlations for the top taxa in the plant microbiome show a slight positive skew. These Pearson correlations were calculated between each focal taxon (here, sorted based on their decreasing abundance) and their top (c) intra- or (d) inter-kingdom counterparts (that is, the comparisons are restricted to the top 100 taxa within each kingdom). (e) Network analysis helps to identify the key phylotypes in the leaf microbiome, which are shown here based on the centrality metrics *degree* and *betweenness*. (f) Influential nodes are shown for the root microbiome.



**Supplementary Fig. S4. Correlations among the PCs from PCA of the microbiome**

Correlation among the top 5 PCs from PCA of the leaf (a-c) and root (d-f) microbiome. PC1 and PC2 from PCA of the combined (bacteria and fungi) leaf-microbiome are correlated with PC1 from PCA of the bacterial community (a) and PC2 from PCA of the fungal community (b), respectively. (c) The correlation among the top 5 PCs from separate PCAs of the leaf bacterial and fungal community are shown. PC1 and PC2 from PCA of the combined root-microbiome are strongly correlated with PC1 (e) and PC2 (d) of the fungal and bacterial community. (f) Shown are the correlations among the top 5 PCs from PCA of the root bacterial and fungal community.

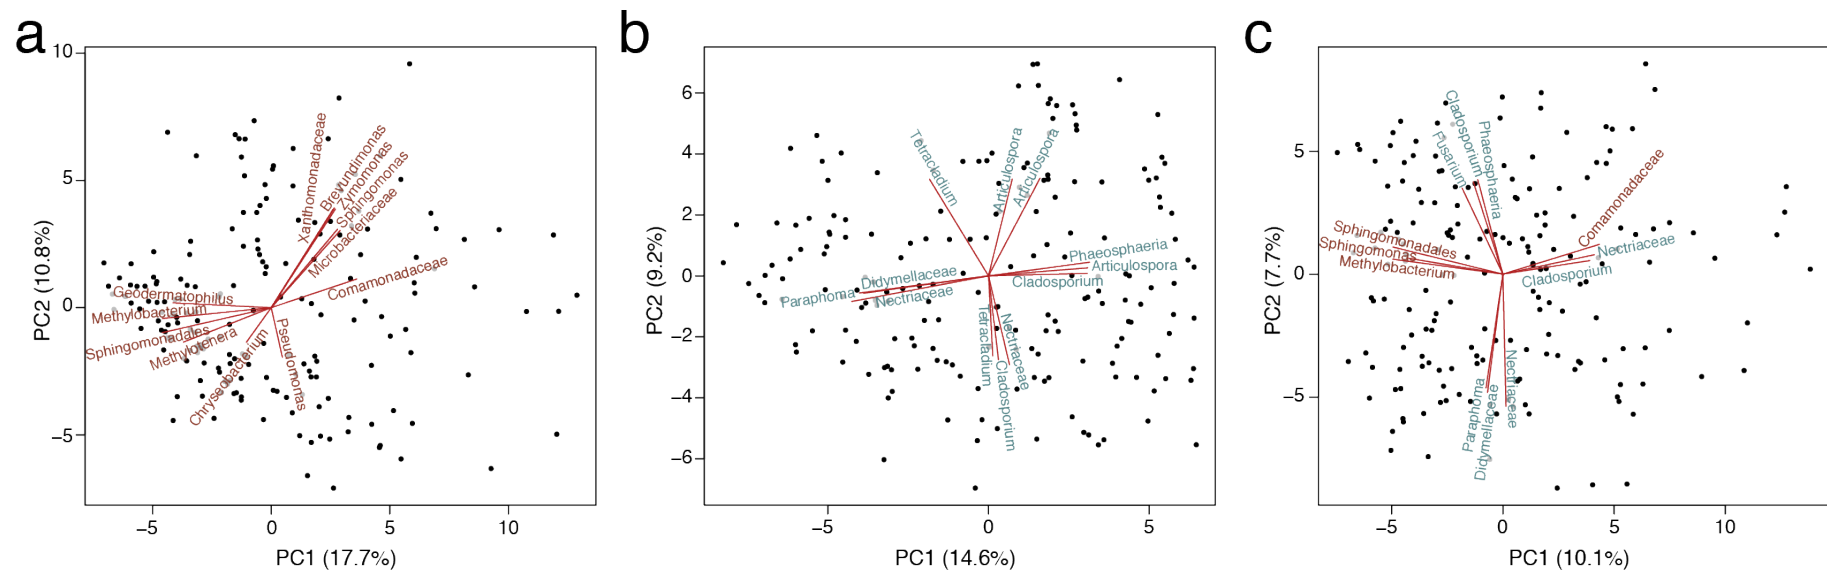

**Supplementary Fig. S5. The results from PCA of the leaf microbiome**

(a) A plot of principal component 1 (PC1) and PC2 from PCA of the top 100 bacteria in the leaf microbiome is shown. (b) A plot of PC1 and PC2 from PCA of the top 100 fungi in the leaf microbiome is shown. (c) A plot of PC1 and PC2 from PCA of the combined leaf microbial community, consisting of the top 100 bacteria and fungi. In each panel, the labels list the top 3 taxa whose abundances separate the samples along the axes (plotted according to their PC loadings).

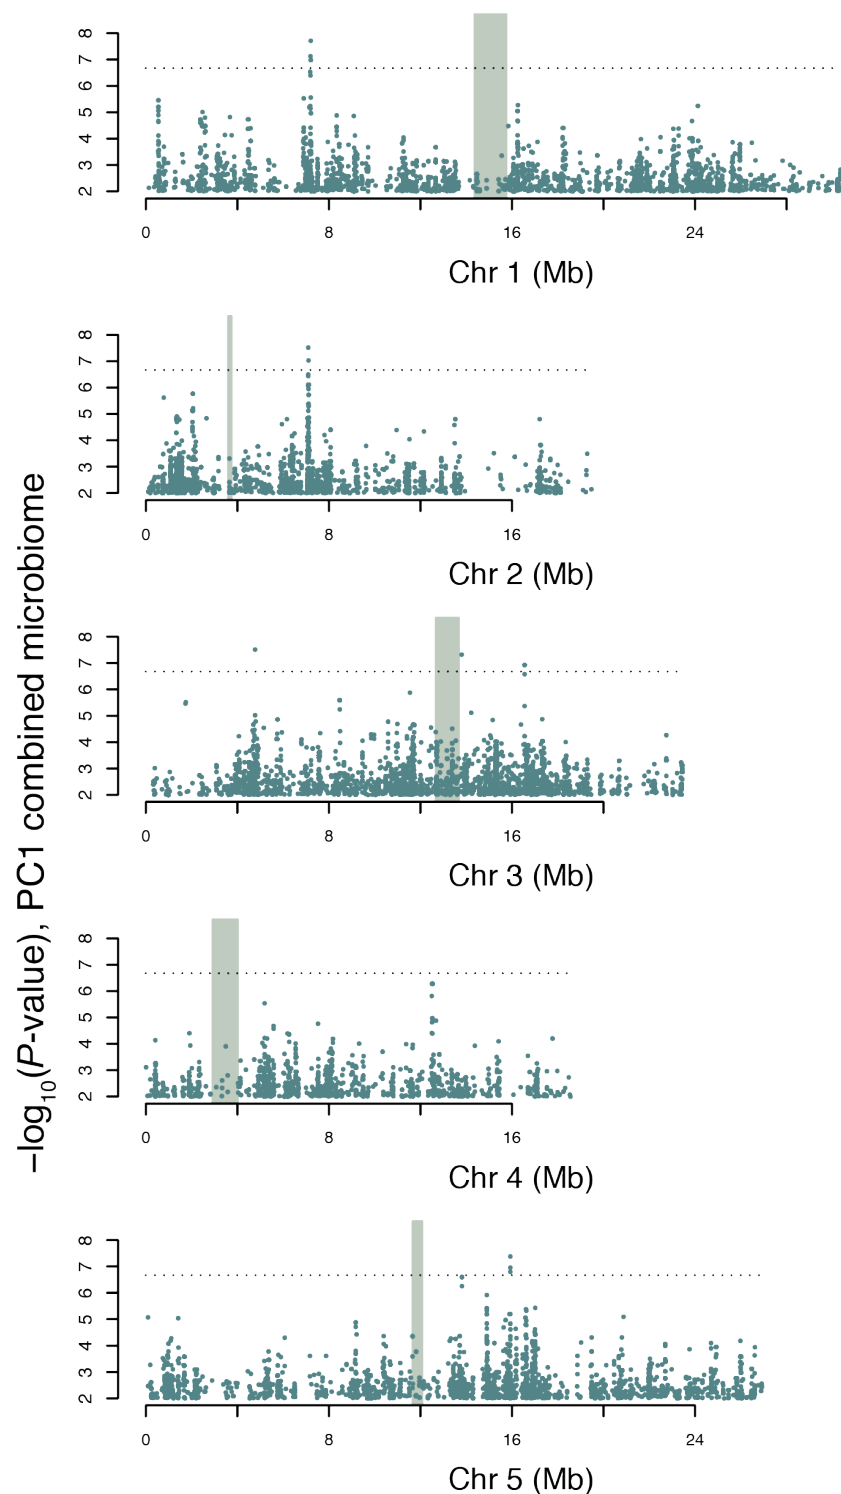

**Supplementary Fig. S6. GWAS of PC1 from PCA of the combined microbiome**

The results from GWAS of PC1 from PCA of the combined bacterial and fungal community are shown. The candidate genes are listed in the main text. To assess genome-wide significance, a permutation approach was used that takes into account population structure. The centromeres along each of *A. thaliana*'s 5 chromosomes are shaded.



## Supplementary Tables

**Supplementary Table S1. The list of accessions used and their collection locations**

| Id   | Name          | Latitude | Longitude | Country                  |
|------|---------------|----------|-----------|--------------------------|
| 8251 | Ag-0          | 45       | 1.3       | France                   |
| 8252 | Alc-0         | 40.31    | -3.22     | Spain                    |
| 8230 | Algutsrum     | 56.68    | 16.5      | Sweden                   |
| 8253 | An-1          | 51.2167  | 4.4       | Belgium                  |
| 8254 | Ang-0         | 50.3     | 5.3       | Belgium                  |
| 8256 | Ba1-2         | 56.4     | 12.9      | Sweden                   |
| 8257 | Ba3-3         | 56.4     | 12.9      | Sweden                   |
| 8258 | Ba4-1         | 56.4     | 12.9      | Sweden                   |
| 8259 | Ba5-1         | 56.4     | 12.9      | Sweden                   |
| 8261 | Bg-2          | 47.6479  | -122.305  | United States of America |
| 8262 | Bil-5         | 63.324   | 18.484    | Sweden                   |
| 8263 | Bil-7         | 63.324   | 18.484    | Sweden                   |
| 8264 | Bla-1         | 41.6833  | 2.8       | Spain                    |
| 8265 | Blh-1         | 48       | 19        | Czech Republic           |
| 8266 | Boo2-1        | 55.86    | 13.51     | Sweden                   |
| 5837 | Bor-1         | 49.4013  | 16.2326   | Czech Republic           |
| 8268 | Bor-4         | 49.4013  | 16.2326   | Czech Republic           |
| 8269 | Br-0          | 49.2     | 16.6166   | Czech Republic           |
| 8231 | Bro1-6        | 56.3     | 16        | Sweden                   |
| 8270 | Bs-1          | 47.5     | 7.5       | Switzerland              |
| 8271 | Bu-0          | 50.5     | 9.5       | Germany                  |
| 8421 | Buckhorn Pass | 41.3599  | -122.755  | United States of America |
| 8272 | Bur-0         | 54.1     | -6.2      | Ireland                  |
| 8274 | Can-0         | 29.2144  | -13.4811  | Spain                    |
| 8275 | Cen-0         | 49       | 0.5       | France                   |
| 8276 | CIBC-17       | 51.4083  | -0.6383   | United Kingdom           |
| 8277 | CIBC-5        | 51.4083  | -0.6383   | United Kingdom           |
| 8278 | Co            | 40.2077  | -8.42639  | Portugal                 |
| 6909 | Col-0         |          |           | Unknown                  |
| 8280 | Ct-1          | 37.3     | 15        | Italy                    |
| 8233 | Dem-4         | 41.1876  | -87.1923  | United States of America |
| 8283 | Dra3-1        | 55.76    | 14.12     | Sweden                   |
| 8284 | Drall-1       | 49.4112  | 16.2815   | Czech Republic           |
| 8285 | Drall-1       | 49.4112  | 16.2815   | Czech Republic           |
| 6008 | Duk           | 49.1     | 16.2      | Czech Republic           |
| 6009 | Eden-1        | 62.877   | 18.177    | Sweden                   |
| 8287 | Eden-2        | 62.877   | 18.177    | Sweden                   |
| 8288 | Edi-0         | 55.9494  | -3.16028  | United Kingdom           |

| Id   | Name          | Latitude | Longitude | Country                  |
|------|---------------|----------|-----------|--------------------------|
| 6016 | Eds-1         | 62.9     | 18.4      | Sweden                   |
| 8289 | Ei-2          | 50.3     | 6.3       | Germany                  |
| 8290 | En-1          | 50       | 8.5       | Germany                  |
| 8291 | Est-1         | 58.3     | 25.3      | Russia                   |
| 8292 | Fab-2         | 63.0165  | 18.3174   | Sweden                   |
| 8293 | Fab-4         | 63.0165  | 18.3174   | Sweden                   |
| 8294 | Fei-0         | 40.5     | -8.32     | Portugal                 |
| 8422 | Fja1-1        | 56.06    | 14.29     | Sweden                   |
| 6024 | Fly2-2        | 55.7509  | 13.3712   | Sweden                   |
| 8295 | Ga-0          | 50.3     | 8         | Germany                  |
| 8296 | Gd-1          | 53.5     | 10.5      | Germany                  |
| 8297 | Ge-0          | 46.5     | 6.08      | Switzerland              |
| 8298 | Got-22        | 51.5338  | 9.9355    | Germany                  |
| 8299 | Got-7         | 51.5338  | 9.9355    | Germany                  |
| 8300 | Gr-1          | 47       | 15.5      | Austria                  |
| 8301 | Gu-0          | 50.3     | 8         | Germany                  |
| 8234 | Gul1-2        | 56.4606  | 15.8127   | Sweden                   |
| 8303 | H55           | 49       | 15        | Czech Republic           |
| 8304 | Hi-0          | 52       | 5         | Netherlands              |
| 8235 | Hod           | 48.8     | 17.1      | Czech Republic           |
| 8423 | Hov2-1        | 56.1     | 13.74     | Sweden                   |
| 8306 | Hov4-1        | 56.1     | 13.74     | Sweden                   |
| 6039 | Hovdala-2     | 56.1     | 13.74     | Sweden                   |
| 8308 | HR-10         | 51.4083  | -0.6383   | United Kingdom           |
| 8309 | HR-5          | 51.4083  | -0.6383   | United Kingdom           |
| 8310 | Hs-0          | 52.24    | 9.44      | Germany                  |
| 8236 | HSm           | 49.33    | 15.76     | Czech Republic           |
| 8311 | In-0          | 47.5     | 11.5      | Austria                  |
| 8312 | Is-0          | 50.5     | 7.5       | Germany                  |
| 8313 | Jm-0          | 49       | 15        | Czech Republic           |
| 8314 | Ka-0          | 47       | 14        | Austria                  |
| 8424 | Kas-2         | 35       | 77        | India                    |
| 8237 | Kavlinge-1    | 55.8     | 13.1      | Sweden                   |
| 8420 | Kelsterbach-4 | 50.0667  | 8.5333    | Germany                  |
| 8238 | Kent          | 51.15    | 0.4       | United Kingdom           |
| 8316 | Kin-0         | 44.46    | -85.37    | United States of America |
| 6040 | Kni-1         | 55.66    | 13.4      | Sweden                   |
| 8317 | Kno-10        | 41.2816  | -86.621   | United States of America |
| 8318 | Kno-18        | 41.2816  | -86.621   | United States of America |
| 8239 | Koln          | 51       | 7         | Germany                  |
| 8319 | Kondara       | 38.48    | 68.49     | Tajikistan               |
| 8240 | Kulturen-1    | 55.705   | 13.196    | Sweden                   |

| Id   | Name    | Latitude | Longitude | Country                  |
|------|---------|----------|-----------|--------------------------|
| 8320 | Kz-1    | 49.5     | 73.1      | Kazakhstan               |
| 8321 | Kz-13   | 49.5     | 73.1      | Kazakhstan               |
| 8322 | Kz-9    | 49.5     | 73.1      | Kazakhstan               |
| 8323 | Lc-0    | 57       | -4        | United Kingdom           |
| 8324 | Ler-1   | 47.984   | 10.8719   | Germany                  |
| 8241 | Liarum  | 55.9473  | 13.821    | Sweden                   |
| 8242 | Lillo-1 | 56.1494  | 15.7884   | Sweden                   |
| 8325 | Lip-0   | 50       | 19.3      | Poland                   |
| 8326 | Lis-1   | 56.0328  | 14.775    | Sweden                   |
| 8222 | Lis-2   | 56.0328  | 14.775    | Sweden                   |
| 8430 | Lisse   | 52.25    | 4.5667    | Netherlands              |
| 8328 | LL-0    | 41.59    | 2.49      | Spain                    |
| 8329 | Lm-2    | 48       | 0.5       | France                   |
| 6042 | Lom1-1  | 56.09    | 13.9      | Sweden                   |
| 6043 | Lov-1   | 62.801   | 18.079    | Sweden                   |
| 6046 | Lov-5   | 62.801   | 18.079    | Sweden                   |
| 8332 | Lp2-2   | 49.38    | 16.81     | Czech Republic           |
| 8333 | Lp2-6   | 49.38    | 16.81     | Czech Republic           |
| 8334 | Lu-1    | 55.71    | 13.2      | Sweden                   |
| 8335 | Lund    | 55.71    | 13.2      | Sweden                   |
| 8336 | Lz-0    | 46       | 3.3       | France                   |
| 8337 | Mir-0   | 44       | 12.37     | Italy                    |
| 8338 | Mr-0    | 44.15    | 9.65      | Italy                    |
| 8339 | Mrk-0   | 49       | 9.3       | Germany                  |
| 8340 | Ms-0    | 55.7522  | 37.6322   | Russia                   |
| 8341 | Mt-0    | 32.34    | 22.46     | Libya                    |
| 8342 | Mz-0    | 50.3     | 8.3       | Germany                  |
| 8429 | N13     | 61.36    | 34.15     | Russia                   |
| 8343 | Na-1    | 47.5     | 1.5       | France                   |
| 8246 | NC-6    | 35       | -79.18    | United States of America |
| 8344 | Nd-1    | 50       | 10        | Switzerland              |
| 8345 | NFA-10  | 51.4083  | -0.6383   | United Kingdom           |
| 8346 | NFA-8   | 51.4083  | -0.6383   | United Kingdom           |
| 8347 | Nok-3   | 52.24    | 4.45      | Netherlands              |
| 8348 | Nw-0    | 50.5     | 8.5       | Germany                  |
| 6064 | Nyl-2   | 62.9513  | 18.2763   | Sweden                   |
| 8349 | Omo2-1  | 56.1481  | 15.8199   | Sweden                   |
| 8350 | Omo2-3  | 56.1481  | 15.8155   | Sweden                   |
| 6074 | Or-1    | 56.4573  | 16.1408   | Sweden                   |
| 8351 | Ost-0   | 60.25    | 18.37     | Sweden                   |
| 8352 | Oy-0    | 60.23    | 6.13      | Norway                   |
| 8353 | Pa-1    | 38.07    | 13.22     | Italy                    |

| <i>Id</i>   | <i>Name</i>        | <i>Latitude</i> | <i>Longitude</i> | <i>Country</i>                  |
|-------------|--------------------|-----------------|------------------|---------------------------------|
| <i>8354</i> | <i>Per-1</i>       | <i>58</i>       | <i>56.3167</i>   | <i>Russia</i>                   |
| <i>8355</i> | <i>Petergof</i>    | <i>59</i>       | <i>29</i>        | <i>Russia</i>                   |
| <i>8243</i> | <i>PHW-2</i>       | <i>43.7703</i>  | <i>11.2547</i>   | <i>Italy</i>                    |
| <i>8244</i> | <i>PHW-34</i>      | <i>48.6103</i>  | <i>2.3086</i>    | <i>France</i>                   |
| <i>8356</i> | <i>Pi-0</i>        | <i>47.04</i>    | <i>10.51</i>     | <i>Austria</i>                  |
| <i>8358</i> | <i>Pna-10</i>      | <i>42.0945</i>  | <i>-86.3253</i>  | <i>United States of America</i> |
| <i>8359</i> | <i>Pna-17</i>      | <i>42.0945</i>  | <i>-86.3253</i>  | <i>United States of America</i> |
| <i>8360</i> | <i>Pro-0</i>       | <i>43.25</i>    | <i>-6</i>        | <i>Spain</i>                    |
| <i>8361</i> | <i>Pu2-23</i>      | <i>49.42</i>    | <i>16.36</i>     | <i>Czech Republic</i>           |
| <i>8362</i> | <i>Pu2-7</i>       | <i>49.42</i>    | <i>16.36</i>     | <i>Czech Republic</i>           |
| <i>8363</i> | <i>Pu2-8</i>       | <i>49.42</i>    | <i>16.36</i>     | <i>Czech Republic</i>           |
| <i>8364</i> | <i>Ra-0</i>        | <i>46</i>       | <i>3.3</i>       | <i>France</i>                   |
| <i>8365</i> | <i>Rak-2</i>       | <i>49</i>       | <i>16</i>        | <i>Czech Republic</i>           |
| <i>8366</i> | <i>Rd-0</i>        | <i>50.5</i>     | <i>8.5</i>       | <i>Germany</i>                  |
| <i>8367</i> | <i>Ren-1</i>       | <i>48.5</i>     | <i>-1.41</i>     | <i>France</i>                   |
| <i>8368</i> | <i>Ren-11</i>      | <i>48.5</i>     | <i>-1.41</i>     | <i>France</i>                   |
| <i>8369</i> | <i>Rev-1</i>       | <i>55.6942</i>  | <i>13.4504</i>   | <i>Sweden</i>                   |
| <i>8370</i> | <i>Rmx-A02</i>     | <i>42.036</i>   | <i>-86.511</i>   | <i>United States of America</i> |
| <i>8371</i> | <i>Rmx-A180</i>    | <i>42.036</i>   | <i>-86.511</i>   | <i>United States of America</i> |
| <i>8372</i> | <i>RRS-10</i>      | <i>41.5609</i>  | <i>-86.4251</i>  | <i>United States of America</i> |
| <i>8373</i> | <i>RRS-7</i>       | <i>41.5609</i>  | <i>-86.4251</i>  | <i>United States of America</i> |
| <i>8374</i> | <i>Rsch-4</i>      | <i>56.3</i>     | <i>34</i>        | <i>Russia</i>                   |
| <i>8375</i> | <i>Rubezhnoe-1</i> | <i>49</i>       | <i>38.28</i>     | <i>Ukraine</i>                  |
| <i>8247</i> | <i>San-2</i>       | <i>56.07</i>    | <i>13.74</i>     | <i>Sweden</i>                   |
| <i>8376</i> | <i>Sanna-2</i>     | <i>62.69</i>    | <i>18</i>        | <i>Sweden</i>                   |
| <i>8377</i> | <i>Santa Clara</i> | <i>37.21</i>    | <i>-121.16</i>   | <i>United States of America</i> |
| <i>8378</i> | <i>Sap-0</i>       | <i>49.49</i>    | <i>14.24</i>     | <i>Czech Republic</i>           |
| <i>8412</i> | <i>Sav-0</i>       | <i>49.1833</i>  | <i>15.8833</i>   | <i>Czech Republic</i>           |
| <i>8379</i> | <i>Se-0</i>        | <i>38.3333</i>  | <i>-3.53333</i>  | <i>Spain</i>                    |
| <i>8245</i> | <i>Seattle-0</i>   | <i>47</i>       | <i>-122.2</i>    | <i>United States of America</i> |
| <i>8380</i> | <i>Sf-1</i>        | <i>41.7833</i>  | <i>3.03333</i>   | <i>Spain</i>                    |
| <i>8248</i> | <i>Shahdara</i>    | <i>38.35</i>    | <i>68.48</i>     | <i>Tajikistan</i>               |
| <i>8381</i> | <i>Sorbo</i>       | <i>38.35</i>    | <i>68.48</i>     | <i>Tajikistan</i>               |
| <i>8382</i> | <i>Spr1-2</i>      | <i>58.4168</i>  | <i>14.1612</i>   | <i>Sweden</i>                   |
| <i>8383</i> | <i>Spr1-6</i>      | <i>58.4168</i>  | <i>14.1612</i>   | <i>Sweden</i>                   |
| <i>8384</i> | <i>Sq-1</i>        | <i>51.4083</i>  | <i>-0.6383</i>   | <i>United Kingdom</i>           |
| <i>8385</i> | <i>Sq-8</i>        | <i>51.4083</i>  | <i>-0.6383</i>   | <i>United Kingdom</i>           |
| <i>8386</i> | <i>Sr:5</i>        | <i>58.9</i>     | <i>11.2</i>      | <i>Sweden</i>                   |
| <i>8387</i> | <i>St-0</i>        | <i>59</i>       | <i>18</i>        | <i>Sweden</i>                   |
| <i>6088</i> | <i>Stu1-1</i>      | <i>56.4666</i>  | <i>16.1284</i>   | <i>Sweden</i>                   |
| <i>8388</i> | <i>Stw-0</i>       | <i>52</i>       | <i>36</i>        | <i>Russia</i>                   |
| <i>8389</i> | <i>Ta-0</i>        | <i>49.5</i>     | <i>14.5</i>      | <i>Czech Republic</i>           |

| Id   | Name      | Latitude | Longitude | Country                  |
|------|-----------|----------|-----------|--------------------------|
| 8390 | Tamm-2    | 60       | 23.5      | Finland                  |
| 8391 | Tamm-27   | 60       | 23.5      | Finland                  |
| 6243 | Tottarp-2 | 55.95    | 13.85     | Sweden                   |
| 8392 | Ts-1      | 41.7194  | 2.93056   | Spain                    |
| 8393 | Ts-5      | 41.7194  | 2.93056   | Spain                    |
| 8394 | Tsu-1     | 34.43    | 136.31    | Japan                    |
| 8395 | Tu-0      | 45       | 7.5       | Italy                    |
| 8426 | Ull1-1    | 56.06    | 13.97     | Sweden                   |
| 8396 | Ull2-3    | 56.0648  | 13.9707   | Sweden                   |
| 8397 | Ull2-5    | 56.0648  | 13.9707   | Sweden                   |
| 8398 | Uod-1     | 48.3     | 14.45     | Austria                  |
| 8428 | Uod-2     | 48.3     | 14.45     | Austria                  |
| 8399 | Uod-7     | 48.3     | 14.45     | Austria                  |
| 8400 | Van-0     | 49.3     | -123      | Canada                   |
| 8401 | Var2-1    | 55.58    | 14.334    | Sweden                   |
| 8402 | Var2-6    | 55.58    | 14.334    | Sweden                   |
| 9058 | Vastervik | 57.75    | 16.6333   | Sweden                   |
| 8249 | Vimmerby  | 57.7     | 15.8      | Sweden                   |
| 9057 | Vinslov   | 56.1     | 13.9167   | Sweden                   |
| 8403 | Wa-1      | 52.3     | 21        | Poland                   |
| 8404 | Wei-0     | 47.25    | 8.26      | Switzerland              |
| 8405 | Ws-0      | 52.3     | 30        | Russia                   |
| 8406 | Ws-2      | 52.3     | 30        | Russia                   |
| 8407 | Wt-5      | 52.3     | 9.3       | Germany                  |
| 8408 | Yo-0      | 37.45    | -119.35   | United States of America |
| 8409 | Zdr-1     | 49.3853  | 16.2544   | Czech Republic           |
| 8410 | Zdr-6     | 49.3853  | 16.2544   | Czech Republic           |

**Table S2, The biological processes that underlie variation in richness in the root microbiome**

The biological (gene ontology, GO) processes enriched in the 1% tail from GWAS of species richness in the bacterial and fungal community are shown. Storey's procedure was used to correct for multiple testing.

| <b>Kingdom</b>  | <b>Biological process</b>                                       | <b>Enrichment</b> | <b>FDR <math>q \leq 10\%</math></b> |
|-----------------|-----------------------------------------------------------------|-------------------|-------------------------------------|
| <i>fungi</i>    | translesion synthesis                                           | 77.4              | 0.0002                              |
| <i>fungi</i>    | zeta DNA polymerase complex                                     | 77.4              | 0.0002                              |
| <i>fungi</i>    | alpha-glucosidase activity                                      | 44.2              | 0.0011                              |
| <i>fungi</i>    | epidermal cell differentiation                                  | 16.6              | 0.0025                              |
| <i>fungi</i>    | structural constituent of ribosome                              | 2.2               | 0.0443                              |
| <i>fungi</i>    | cytosolic large ribosomal subunit                               | 2.9               | 0.0536                              |
| <i>fungi</i>    | DNA repair                                                      | 3.1               | 0.0868                              |
| <i>fungi</i>    | response to UV                                                  | 5.4               | 0.0868                              |
| <i>fungi</i>    | microtubule motor activity                                      | 3.2               | 0.0868                              |
| <i>fungi</i>    | ribosome                                                        | 2.2               | 0.0972                              |
| <i>fungi</i>    | translation                                                     | 2.0               | 0.0972                              |
| <i>fungi</i>    | root epidermal cell differentiation                             | 6.4               | 0.0972                              |
| <i>fungi</i>    | programmed cell death                                           | 6.3               | 0.0972                              |
| <i>fungi</i>    | cytosolic ribosome                                              | 2.2               | 0.0975                              |
| <i>bacteria</i> | tRNA dimethylallyltransferase activity                          | 59.5              | 0.00004                             |
| <i>bacteria</i> | cell wall modification involved in multidimensional cell growth | 44.2              | 0.0020                              |
| <i>bacteria</i> | galactose catabolic process                                     | 28.1              | 0.0046                              |
| <i>bacteria</i> | homoserine dehydrogenase activity                               | 28.1              | 0.0046                              |
| <i>bacteria</i> | cellulase activity                                              | 22.1              | 0.0047                              |
| <i>bacteria</i> | phosphoglucomutase activity                                     | 22.1              | 0.0047                              |
| <i>bacteria</i> | cytosolic part                                                  | 22.1              | 0.0047                              |
| <i>bacteria</i> | glucose 1-phosphate metabolic process                           | 22.1              | 0.0047                              |
| <i>bacteria</i> | cytokinin biosynthetic process                                  | 12.2              | 0.0047                              |

|                 |                                                  |      |        |
|-----------------|--------------------------------------------------|------|--------|
| <i>bacteria</i> | tRNA processing                                  | 11.9 | 0.0047 |
| <i>bacteria</i> | aspartate family amino acid biosynthetic process | 18.2 | 0.0066 |
| <i>bacteria</i> | detection of gravity                             | 17.2 | 0.0072 |
| <i>bacteria</i> | gametophyte development                          | 11.0 | 0.0249 |
| <i>bacteria</i> | protein import into nucleus                      | 8.8  | 0.0440 |
| <i>bacteria</i> | cotyledon vascular tissue pattern formation      | 8.3  | 0.0480 |
| <i>bacteria</i> | starch biosynthetic process                      | 7.5  | 0.0600 |
| <i>bacteria</i> | SCF ubiquitin ligase complex                     | 4.7  | 0.0793 |
| <i>bacteria</i> | cellular response to phosphate starvation        | 2.9  | 0.0793 |
| <i>bacteria</i> | ubiquitin-protein ligase activity                | 2.1  | 0.0793 |
| <i>bacteria</i> | pectinesterase inhibitor activity                | 3.6  | 0.0889 |
| <i>bacteria</i> | protein ubiquitination                           | 3.1  | 0.0948 |
